# Supplementary material for: Reduction of intestinal fat digestion and absorption by β-glucan secreted by Rhizobium pusense via interference in triglyceride hydrolysis
Source: Royal Society of Chemistry journal article supplement (doi:10.1039/d2fo01123a), 2022-01-01
Supplement: d2fo01123a1.pdf [file d2fo01123a1.pdf]

## **Reduction of intestinal fat digestion and absorption by $\beta$ -glucan secreted by *Rhizobium pusense* via interference of triglyceride hydrolysis**

Bin Zhang<sup>a,b</sup>, Zhenna Zhang<sup>a,b</sup>, Dong Song<sup>c</sup>, Xiaomei Lyu<sup>b\*</sup>, Wei Zhao<sup>a,b</sup>\*

<sup>a</sup> State Key Laboratory of Food Science and Technology, Jiangnan University, Wuxi, Jiangsu 214122, People's Republic of China

<sup>b</sup> School of Food Science and Technology, Jiangnan University, Wuxi, Jiangsu 214122, People's Republic of China

<sup>c</sup> Jiangxi Baiyue Food Co. Ltd, Pingxiang, Jiangxi 337000, People's Republic of China

\*Corresponding author and address:

Xiaomei Lyu, School of Food Science and Technology, Jiangnan University, No. 1800 Lihu Road, Wuxi 214122, China

Wei Zhao, State Key Laboratory of Food Science & School of Food Science and Technology, Jiangnan University, No. 1800 Lihu Road, Wuxi 214122, China

Tel/Fax: 0510-85329081

E-mail: [xmlyu@jiangnan.edu.cn](mailto:xmlyu@jiangnan.edu.cn); [zhaow@jiangnan.edu.cn](mailto:zhaow@jiangnan.edu.cn)

**Table S1.** Ingredients of the four fat types.

| Fat type    | Ingredients                                                                                           |
|-------------|-------------------------------------------------------------------------------------------------------|
| Heavy cream | Cream, carrageenan.                                                                                   |
| Mayonnaise  | Rapeseed oil, water, egg yolk, vinegar, sugar, xanthan gum, lemon juice, vanilla, chemical seasoning. |
| Coconut oil | Coconut oil                                                                                           |
| Olive oil   | Olive oil                                                                                             |
